# Supplementary material for: Evaluation of geochemical proxies and radiocarbon data from a loess record of the Upper Palaeolithic site Kammern-Grubgraben, Lower Austria
Source: Copernicus journal article supplement (doi:10.5194/egqsj-71-23-2022), 2022-02-14
Supplement: Supplementary file 1 [file egqsj-71-23-2022-supplement.pdf]

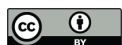

*Supplement of*

**Evaluation of geochemical proxies and radiocarbon data  
from a loess record of the Upper Palaeolithic site  
Kammern-Grubgraben, Lower Austria**

**Lilian Reiss et al.**

*Correspondence to:* Lilian Reiss ([lilian.reiss@fau.de](mailto:lilian.reiss@fau.de))

The copyright of individual parts of the supplement might differ from the article licence.

(a)

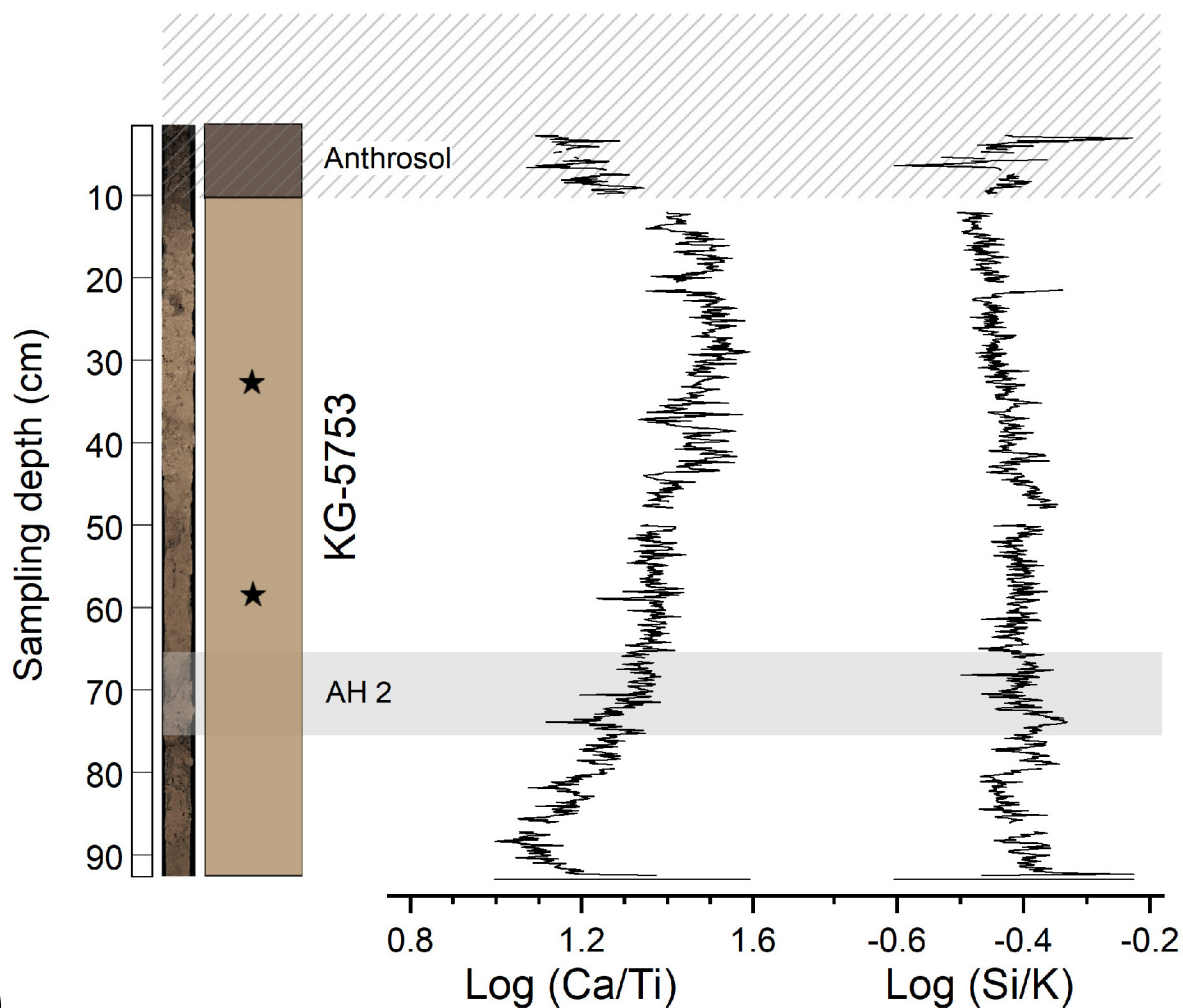

(b)

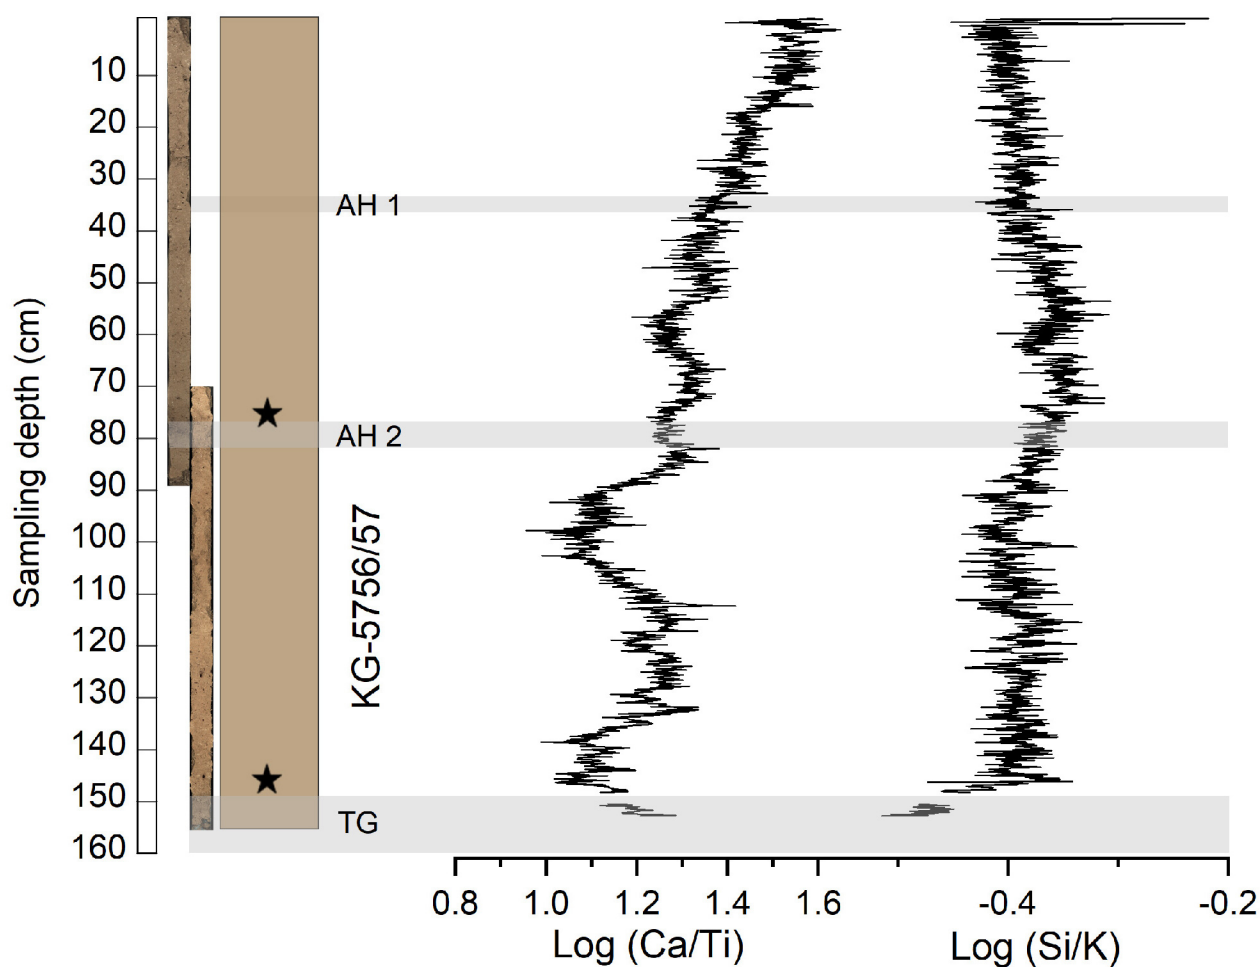

Fig. S1. Logarithmic element ratios (Ca/Ti and Si/K) of (a) KG-5753 and (b) KG-5756/57. Hatched area in (a) represents the base of the sampled anthrosol, shaded areas the archaeological horizons (AH 1 and AH 2) and the tundra gley (TG). Black stars symbolise the positions of radiocarbon samples. Missing values are indicated by gaps.
